# Supplementary material for: Palladium(ii)-complexes of bi- and tri-dentate phosphine ligands: precursor for palladium–phosphorous nanoparticles and activity towards Suzuki–Miyaura coupling
Source: Royal Society of Chemistry journal article supplement (doi:10.1039/d2nj05357h), 2022-12-15
Supplement: d2nj05357h1.pdf [file d2nj05357h1.pdf]

## Supplementary Information

### Palladium(II)-complexes of bi- and tri-dentate phosphines ligands: Precursor for palladium-phosphorous nanoparticles and activity towards Suzuki-Miyaura coupling

Gyandshwar Kumar Rao,<sup>\*a</sup> Anirban Dutta,<sup>b</sup> Nisha Yadav,<sup>a</sup> Preeti Oswal,<sup>c</sup> Arun Kumar,<sup>c</sup> Ajai K. Singh<sup>\*d</sup>

<sup>a</sup>Department of Chemistry, Biochemistry and Forensic Science, Amity School of Applied Sciences,  
Amity University Haryana, Gurugram, Haryana, 122413, India.

<sup>b</sup>Nanotechnology Department, Indian Oil Research and Development Center, Sector 13, Faridabad,  
Haryana, 121007, India.

<sup>c</sup>School of Physical Sciences, Doon University, Mothrowala, Dehradun, Uttarakhand-248001, India.

<sup>d</sup>Department of Chemistry, Indian Institute of Technology Delhi, New Delhi-110016, India.

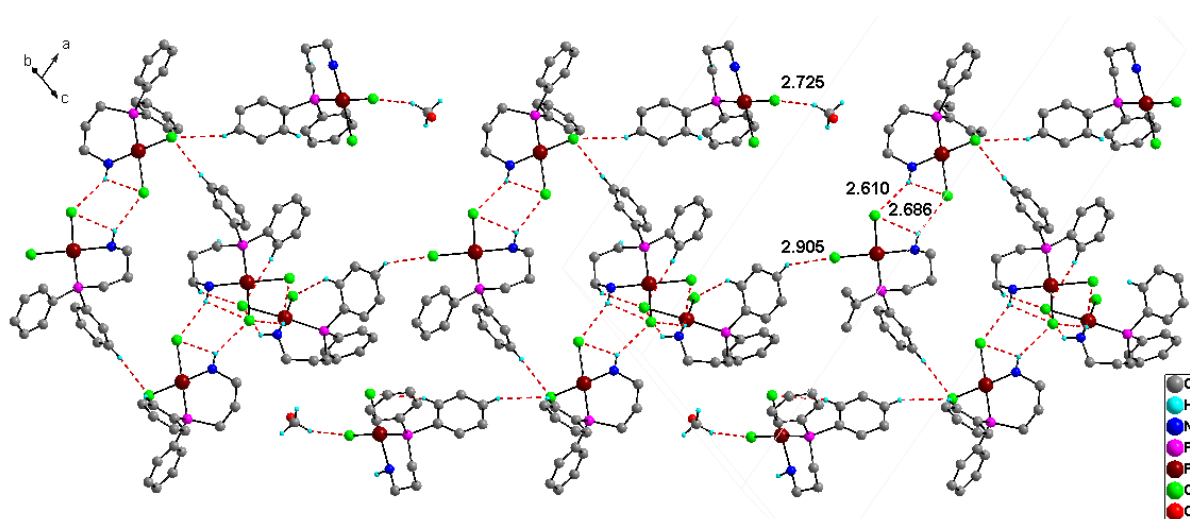

**Fig. S1.** Intra and intermolecular Cl...H and N-H...Cl interactions of complex 1.

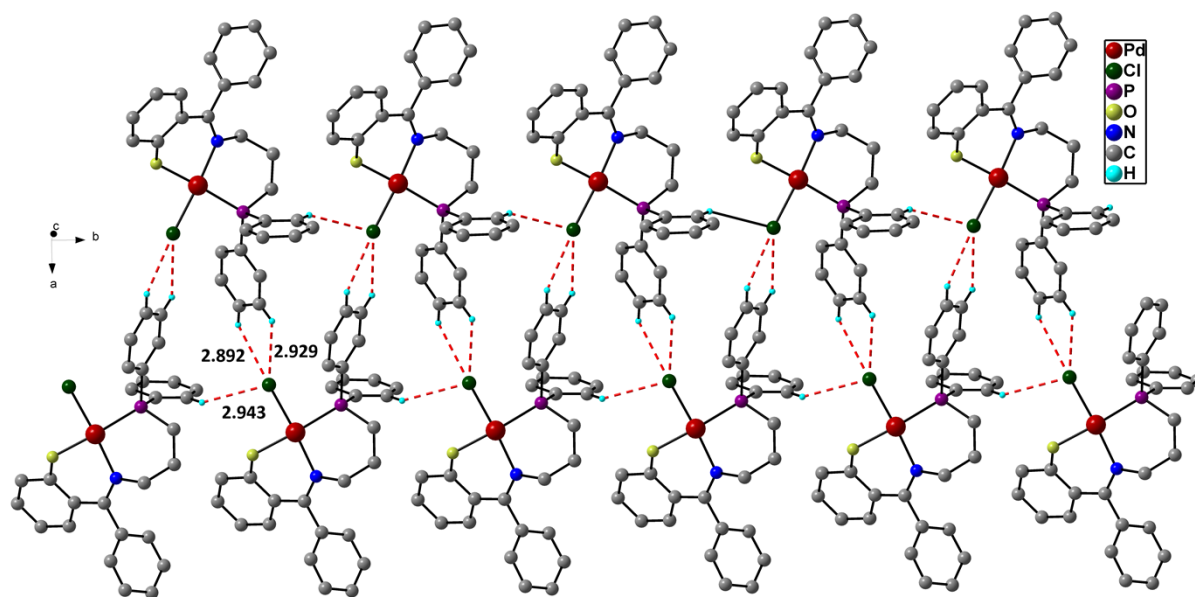

**Fig. S2.** Molecular packing of **2** showing Cl $\cdots$ H (aromatic) interaction.

**Table S1.** Crystal data and structure refinement parameters for **1** and **2**

|                                                     | <b>1</b>                                                                                                                                       | <b>2</b>                                                                                                                                      |
|-----------------------------------------------------|------------------------------------------------------------------------------------------------------------------------------------------------|-----------------------------------------------------------------------------------------------------------------------------------------------|
| Empirical formula                                   | C <sub>15</sub> H <sub>17</sub> Cl <sub>2</sub> N P Pd                                                                                         | C <sub>28</sub> H <sub>25</sub> ClNOPPd                                                                                                       |
| Formula weight                                      | 419.57                                                                                                                                         | 564.31                                                                                                                                        |
| Colour                                              | Orange                                                                                                                                         | Red                                                                                                                                           |
| Crystal size, mm <sup>3</sup>                       | 0.343 × 0.290 × 0.225                                                                                                                          | 0.370 × 0.312 × 0.295                                                                                                                         |
| Crystal system                                      | Monoclinic                                                                                                                                     | Monoclinic                                                                                                                                    |
| Space group                                         | <i>C</i> 2/ <i>c</i>                                                                                                                           | <i>P</i> 21/ <i>n</i>                                                                                                                         |
| Unit Cell dimension                                 | <i>a</i> = 34.786(10) Å<br><i>b</i> = 12.983(4) Å<br><i>c</i> = 17.594(5) Å<br>$\alpha$ = 90.00°<br>$\beta$ = 107.457(5)°<br>$\gamma$ = 90.00° | <i>a</i> = 12.606(3) Å<br><i>b</i> = 8.4228(19) Å<br><i>c</i> = 22.778(5) Å<br>$\alpha$ = 90.00°<br>$\beta$ = 96.878(5)°<br>$\gamma$ = 90.00° |
| Volume [Å <sup>3</sup> ]                            | 7580(4)                                                                                                                                        | 2401.0(9)                                                                                                                                     |
| <i>Z</i>                                            | 16                                                                                                                                             | 4                                                                                                                                             |
| $\rho$ , (calc.) Mg/m <sup>3</sup>                  | 1.471                                                                                                                                          | 1.561                                                                                                                                         |
| $\mu$ , mm <sup>-1</sup>                            | 1.336                                                                                                                                          | 0.973                                                                                                                                         |
| <i>F</i> (000)                                      | 3344                                                                                                                                           | 1144                                                                                                                                          |
| $\theta$ , range (°)                                | 1.68 to 25.00                                                                                                                                  | 1.8 to 25.00                                                                                                                                  |
| Index ranges                                        | -41 ≤ <i>h</i> ≤ 41<br>-15 ≤ <i>k</i> ≤ 15<br>-20 ≤ <i>l</i> ≤ 20                                                                              | -13 ≤ <i>h</i> ≤ 14<br>-10 ≤ <i>k</i> ≤ 9<br>-27 ≤ <i>l</i> ≤ 25                                                                              |
| Reflections collected                               | 34521                                                                                                                                          | 12118                                                                                                                                         |
| Independent reflections( <i>R</i> <sub>int</sub> .) | 6673 [ <i>R</i> <sub>int</sub> = 0.0744]                                                                                                       | 4206 [ <i>R</i> ( <i>int</i> ) = 0.0707]                                                                                                      |
| Completeness to max. $\theta$ , %                   | 99.8                                                                                                                                           | 99.8                                                                                                                                          |
| Data/restraints/ parameters                         | 6673 / 0 / 361                                                                                                                                 | 4196 / 0 / 298                                                                                                                                |
| Goodness-of-fit on <i>F</i> <sup>2</sup>            | 1.079                                                                                                                                          | 0.939                                                                                                                                         |

|                                                 |                                     |                                     |
|-------------------------------------------------|-------------------------------------|-------------------------------------|
| Final R indices<br>[ $I > 2\sigma(I)$ ]         | $R_1 = 0.0589$ ,<br>$wR_2 = 0.1226$ | $R_1 = 0.0466$<br>$wR_2 = 0.0908$   |
| R indices (all data)                            | $R_1 = 0.0785$ ,<br>$wR_2 = 0.1313$ | $R_1 = 0.0649$ ,<br>$wR_2 = 0.0964$ |
| Largest diff. peak/hole [ $e.\text{\AA}^{-3}$ ] | 1.01/-0.69                          | 1.07/-0.85                          |
| CCDC No.                                        | 2225178                             | 2225179                             |

**Table S2.** Selected bond lengths (Å) and bond angles (°) of **1**

| Bond Length (Å)   |            |                   |           |
|-------------------|------------|-------------------|-----------|
| Pd(2)-Pd(2)       | 2.2223(17) | C(10)-C(10)       | 1.380(9)  |
| Pd(2)-Pd(2)       | 2.3923(17) | C(18)-C(18)       | 1.544(9)  |
| Pd(2)-Pd(2)       | 2.2903(17) | C(25)-C(25)       | 1.385(9)  |
| Pd(2)-Pd(2)       | 2.072(5)   | C(25)-C(25)       | 1.383(9)  |
| Pd(1)-Pd(1)       | 2.2250(16) | C(19)-C(19)       | 1.375(8)  |
| Pd(1)-Pd(1)       | 2.294(2)   | C(19)-C(19)       | 1.395(8)  |
| Pd(1)-Pd(1)       | 2.3865(18) | C(23)-C(23)       | 1.383(9)  |
| Pd(1)-Pd(1)       | 2.053(6)   | C(23)-C(23)       | 1.369(10) |
| P(2)-P(2)         | 1.813(6)   | C(14)-C(14)       | 1.386(10) |
| P(2)-P(2)         | 1.814(6)   | C(14)-C(14)       | 1.357(12) |
| P(2)-P(2)         | 1.810(7)   | C(12)-C(12)       | 1.333(12) |
| P(4)-P(4)         | 1.820(6)   | C(12)-C(12)       | 1.395(10) |
| P(4)-P(4)         | 1.806(7)   | C(16)-C(16)       | 1.498(9)  |
| P(4)-P(4)         | 1.819(6)   | C(26)-C(26)       | 1.380(10) |
| C(4)-C(4)         | 1.394(9)   | C(1)-C(1)         | 1.496(10) |
| C(4)-C(4)         | 1.375(9)   | C(9)-C(9)         | 1.384(10) |
| N(2)-N(2)         | 1.471(8)   | C(7)-C(7)         | 1.353(11) |
| N(1)-N(1)         | 1.475(9)   | C(22)-C(22)       | 1.372(10) |
| C(6)-C(6)         | 1.374(9)   | C(30)-C(30)       | 1.391(9)  |
| C(6)-C(6)         | 1.384(11)  | C(29)-C(29)       | 1.360(11) |
| C(3)-C(3)         | 1.528(9)   | C(28)-C(28)       | 1.374(12) |
| C(10)-C(10)       | 1.375(9)   | C(21)-C(21)       | 1.397(10) |
| Bond Angle (°)    |            |                   |           |
| P(2)-Pd(2)-Cl(3)  | 173.83(6)  | C(15)-C(10)-C(11) | 119.1(6)  |
| P(2)-Pd(2)-Cl(4)  | 91.21(6)   | C(11)-C(10)-P(4)  | 122.0(6)  |
| Cl(4)-Pd(2)-Cl(3) | 92.47(6)   | C(17)-C(18)-P(2)  | 114.0(4)  |
| N(2)-Pd(2)-P(2)   | 90.02(15)  | C(26)-C(25)-P(2)  | 121.7(5)  |
| N(2)-Pd(2)-Cl(3)  | 86.34(15)  | C(30)-C(25)-P(2)  | 118.8(5)  |
| N(2)-Pd(2)-Cl(4)  | 178.71(16) | C(30)-C(25)-C(26) | 119.4(6)  |
| P(4)-Pd(1)-Cl(1)  | 90.35(7)   | C(6)-C(5)-C(4)    | 120.7(7)  |
| P(4)-Pd(1)-Cl(2)  | 176.77(8)  | C(24)-C(19)-P(2)  | 118.9(4)  |
| Cl(1)-Pd(1)-Cl(2) | 92.50(8)   | C(24)-C(19)-C(20) | 118.3(6)  |
| N(1)-Pd(1)-P(4)   | 91.76(17)  | C(20)-C(19)-P(2)  | 122.9(5)  |
| N(1)-Pd(1)-Cl(1)  | 174.92(18) | C(22)-C(23)-C(24) | 119.7(7)  |
| N(1)-Pd(1)-Cl(2)  | 85.52(17)  | C(19)-C(24)-C(23) | 121.4(6)  |
| C(18)-P(2)-Pd(2)  | 110.1(2)   | C(13)-C(14)-C(15) | 119.9(9)  |
| C(18)-P(2)-C(25)  | 104.3(3)   | C(13)-C(12)-C(11) | 120.8(8)  |
| C(25)-P(2)-Pd(2)  | 119.4(2)   | N(2)-C(16)-C(17)  | 114.3(6)  |
| C(19)-P(2)-Pd(2)  | 108.0(2)   | C(27)-C(26)-C(25) | 119.8(7)  |
| C(19)-P(2)-C(18)  | 107.8(3)   | C(16)-C(17)-C(18) | 112.9(5)  |
| C(19)-P(2)-C(25)  | 106.6(3)   | N(1)-C(1)-C(2)    | 112.7(6)  |
| C(4)-P(4)-Pd(1)   | 116.9(2)   | C(4)-C(9)-C(8)    | 121.0(7)  |
| C(3)-P(4)-Pd(1)   | 111.0(2)   | C(8)-C(7)-C(6)    | 120.3(7)  |
| C(3)-P(4)-C(4)    | 102.1(3)   | C(23)-C(22)-C(21) | 120.6(7)  |

|                  |          |                   |          |
|------------------|----------|-------------------|----------|
| C(3)-P(4)-C(10)  | 107.1(3) | C(25)-C(30)-C(29) | 120.0(7) |
| C(10)-P(4)-Pd(1) | 112.1(2) | C(10)-C(15)-C(14) | 120.2(7) |
| C(10)-P(4)-C(4)  | 106.8(3) | C(7)-C(8)-C(9)    | 120.1(8) |
| C(5)-C(4)-P(4)   | 118.8(5) | C(12)-C(13)-C(14) | 120.8(7) |
| C(9)-C(4)-P(4)   | 122.9(5) | C(28)-C(29)-C(30) | 120.2(8) |
| C(9)-C(4)-C(5)   | 118.2(6) | C(29)-C(28)-C(27) | 120.1(8) |
| C(16)-N(2)-Pd(2) | 121.6(4) | C(1)-C(2)-C(3)    | 114.9(6) |
| C(1)-N(1)-Pd(1)  | 126.0(4) | C(22)-C(21)-C(20) | 119.6(6) |
| C(5)-C(6)-C(7)   | 119.6(7) | C(28)-C(27)-C(26) | 120.5(8) |
| C(2)-C(3)-P(4)   | 114.3(5) | C(10)-C(11)-C(12) | 119.3(8) |
| C(15)-C(10)-P(4) | 118.9(5) | C(19)-C(20)-C(21) | 120.4(6) |

**Table S3.** Selected bond lengths (Å) and bond angles (°) of **2**

| Bond Length (Å)   |            |                   |          |
|-------------------|------------|-------------------|----------|
| Pd(1)-Cl(1)       | 2.2791(13) | C(24)-C(25)       | 1.409(6) |
| Pd(1)-P(1)        | 2.2376(13) | C(17)-C(22)       | 1.389(6) |
| Pd(1)-O(1)        | 2.039(3)   | C(17)-C(18)       | 1.385(6) |
| Pd(1)-N(1)        | 2.034(4)   | C(25)-C(26)       | 1.369(6) |
| P(1)-C(13)        | 1.813(4)   | C(28)-C(27)       | 1.371(6) |
| P(1)-C(12)        | 1.823(5)   | C(22)-C(21)       | 1.382(7) |
| P(1)-C(6)         | 1.815(5)   | C(26)-C(27)       | 1.384(7) |
| O(1)-C(24)        | 1.313(5)   | C(6)-C(1)         | 1.377(6) |
| N(1)-C(16)        | 1.306(5)   | C(6)-C(5)         | 1.392(6) |
| N(1)-C(15)        | 1.490(5)   | C(4)-C(5)         | 1.380(7) |
| C(16)-C(23)       | 1.472(6)   | C(4)-C(3)         | 1.372(7) |
| C(16)-C(17)       | 1.504(6)   | C(1)-C(2)         | 1.384(7) |
| C(23)-C(24)       | 1.426(6)   | C(8)-C(9)         | 1.366(8) |
| C(23)-C(28)       | 1.405(6)   | C(18)-C(19)       | 1.358(7) |
| C(7)-C(12)        | 1.376(6)   | C(9)-C(10)        | 1.358(7) |
| C(7)-C(8)         | 1.385(7)   | C(10)-C(11)       | 1.391(6) |
| C(13)-C(14)       | 1.526(6)   | C(19)-C(20)       | 1.381(8) |
| C(14)-C(15)       | 1.518(6)   | C(20)-C(21)       | 1.361(8) |
| C(12)-C(11)       | 1.381(6)   | C(3)-C(2)         | 1.363(7) |
| Bond Angles (°)   |            |                   |          |
| P(1)-Pd(1)-Cl(1)  | 88.38(5)   | C(23)-C(24)-O(1)  | 123.5(4) |
| O(1)-Pd(1)-Cl(1)  | 88.35(9)   | C(25)-C(24)-O(1)  | 119.2(4) |
| O(1)-Pd(1)-P(1)   | 175.25(9)  | C(25)-C(24)-C(23) | 117.3(4) |
| N(1)-Pd(1)-Cl(1)  | 176.19(11) | C(14)-C(15)-N(1)  | 113.0(3) |
| N(1)-Pd(1)-P(1)   | 95.40(11)  | C(22)-C(17)-C(16) | 120.9(4) |
| N(1)-Pd(1)-O(1)   | 87.85(13)  | C(18)-C(17)-C(16) | 119.3(4) |
| C(13)-P(1)-Pd(1)  | 111.86(15) | C(18)-C(17)-C(22) | 119.6(5) |
| C(12)-P(1)-Pd(1)  | 111.31(15) | C(26)-C(25)-C(24) | 121.8(5) |
| C(12)-P(1)-C(13)  | 106.5(2)   | C(27)-C(28)-C(23) | 122.4(5) |
| C(6)-P(1)-Pd(1)   | 118.71(16) | C(21)-C(22)-C(17) | 118.8(5) |
| C(6)-P(1)-C(13)   | 102.0(2)   | C(27)-C(26)-C(25) | 121.1(5) |
| C(6)-P(1)-C(12)   | 105.5(2)   | C(1)-C(6)-P(1)    | 122.2(4) |
| C(24)-O(1)-Pd(1)  | 116.7(3)   | C(5)-C(6)-P(1)    | 119.5(4) |
| C(16)-N(1)-Pd(1)  | 122.8(3)   | C(5)-C(6)-C(1)    | 118.2(4) |
| C(15)-N(1)-Pd(1)  | 118.5(3)   | C(3)-C(4)-C(5)    | 120.6(5) |
| C(15)-N(1)-C(16)  | 118.4(4)   | C(26)-C(27)-C(28) | 118.6(4) |
| C(23)-C(16)-N(1)  | 123.9(4)   | C(2)-C(1)-C(6)    | 120.8(5) |
| C(17)-C(16)-N(1)  | 121.5(4)   | C(4)-C(5)-C(6)    | 120.4(5) |
| C(17)-C(16)-C(23) | 114.5(4)   | C(9)-C(8)-C(7)    | 119.7(5) |
| C(24)-C(23)-C(16) | 122.1(4)   | C(19)-C(18)-C(17) | 120.2(5) |
| C(28)-C(23)-C(16) | 119.1(4)   | C(10)-C(9)-C(8)   | 120.9(5) |
| C(28)-C(23)-C(24) | 118.8(4)   | C(11)-C(10)-C(9)  | 119.7(5) |
| C(8)-C(7)-C(12)   | 120.3(5)   | C(20)-C(19)-C(18) | 120.8(5) |
| C(14)-C(13)-P(1)  | 113.4(3)   | C(21)-C(20)-C(19) | 119.1(5) |

|                   |          |                   |          |
|-------------------|----------|-------------------|----------|
| C(15)-C(14)-C(13) | 112.9(4) | C(10)-C(11)-C(12) | 120.1(5) |
| C(7)-C(12)-P(1)   | 121.8(4) | C(2)-C(3)-C(4)    | 119.5(5) |
| C(11)-C(12)-P(1)  | 119.0(4) | C(20)-C(21)-C(22) | 121.4(5) |
| C(11)-C(12)-C(7)  | 119.2(4) | C(3)-C(2)-C(1)    | 120.5(5) |

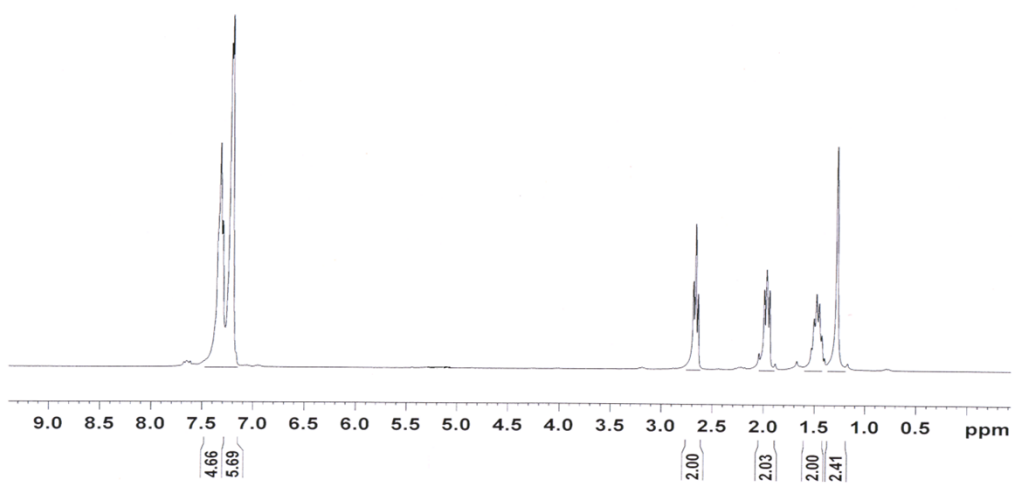

**Fig. S3.**  $^1\text{H}$  NMR Spectra of ligand L1

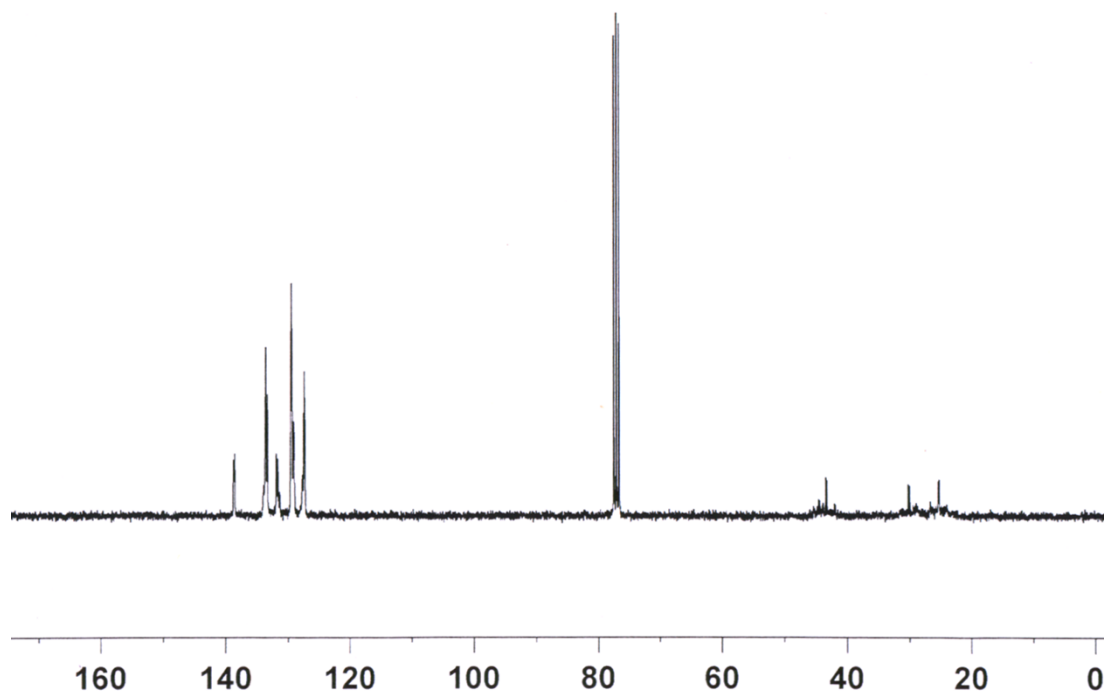

**Fig. S4.**  $^{13}\text{C}\{^1\text{H}\}$  NMR Spectra of ligand L1



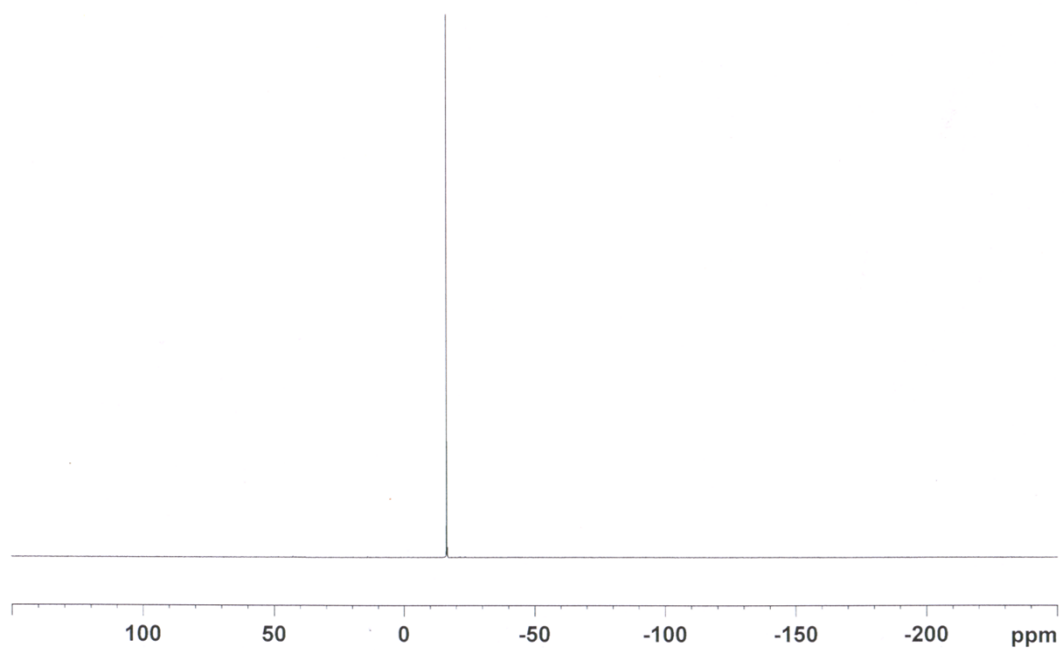

**Fig. S5.**  $^{31}\text{P}\{^1\text{H}\}$  NMR Spectra of ligand L1

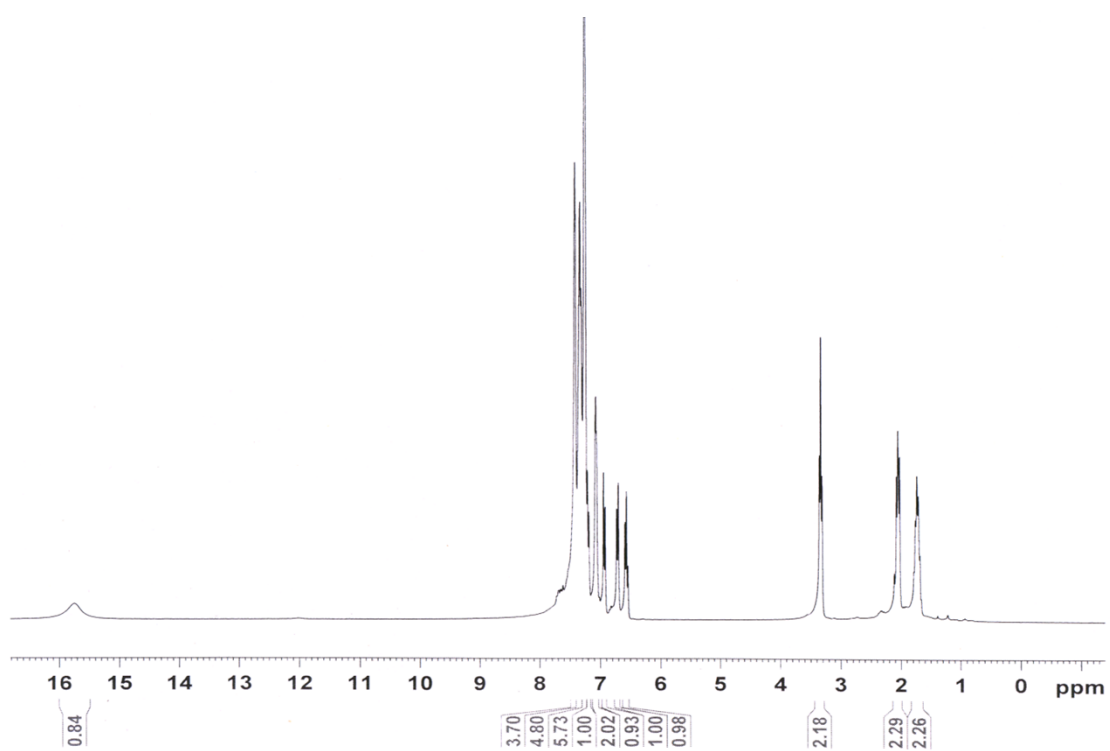

**Fig. S6.**  $^1\text{H}$  NMR Spectra of ligand L2

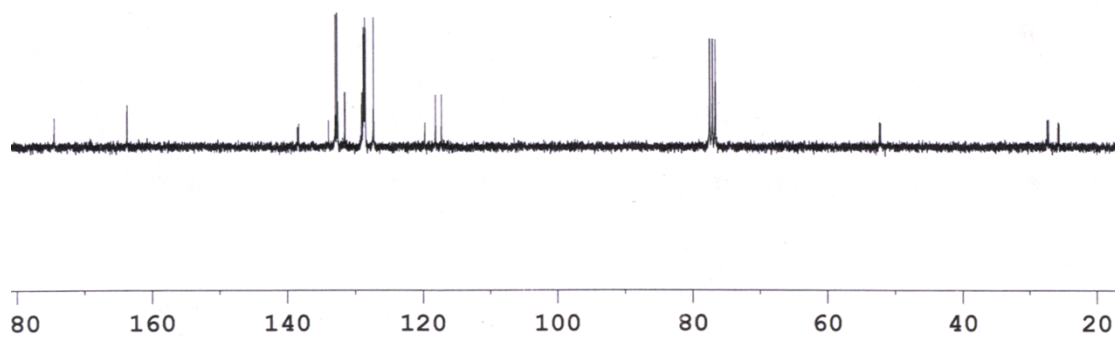

**Fig. S7.**  $^{13}\text{C}\{^1\text{H}\}$  NMR Spectra of ligand L2

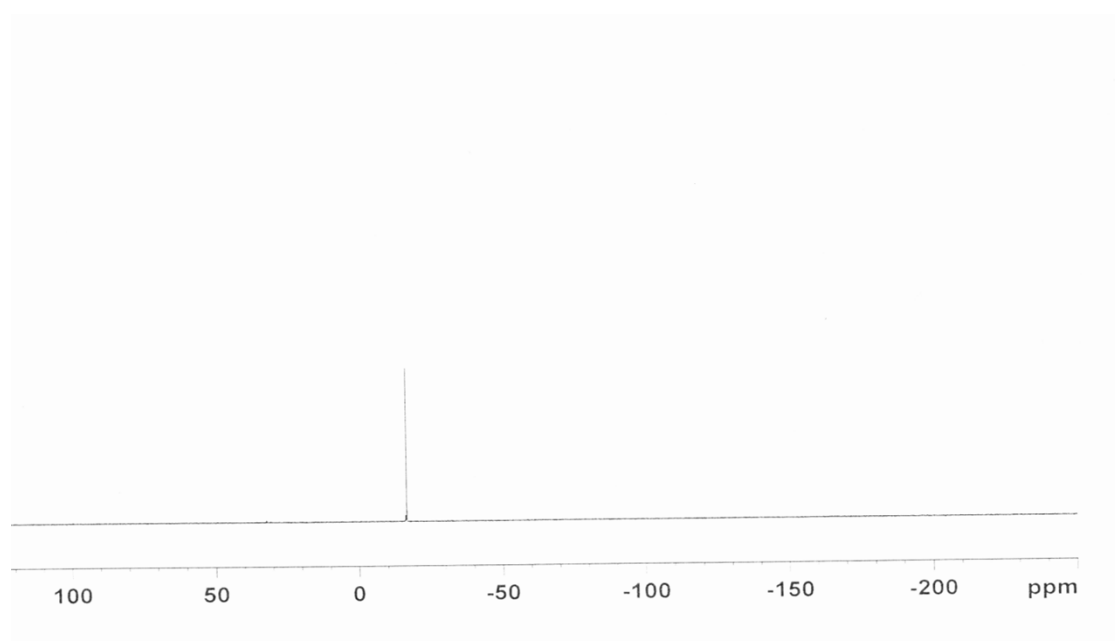

**Fig. S8.**  $^{31}\text{P}\{^1\text{H}\}$  NMR Spectra of ligand L2

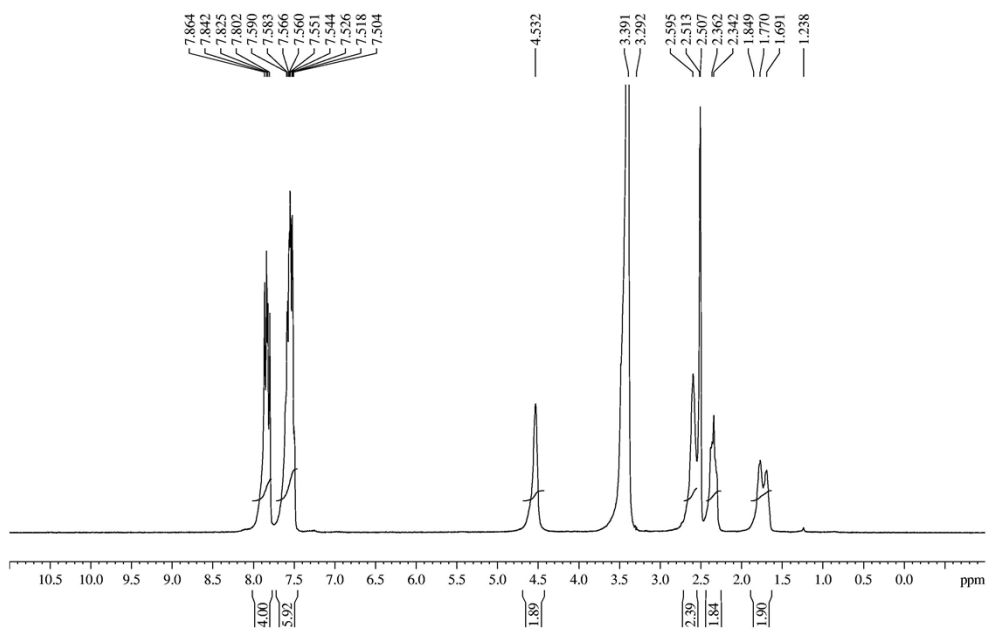

**Fig. S9.**  $^1\text{H}$  NMR Spectra of complex **1**

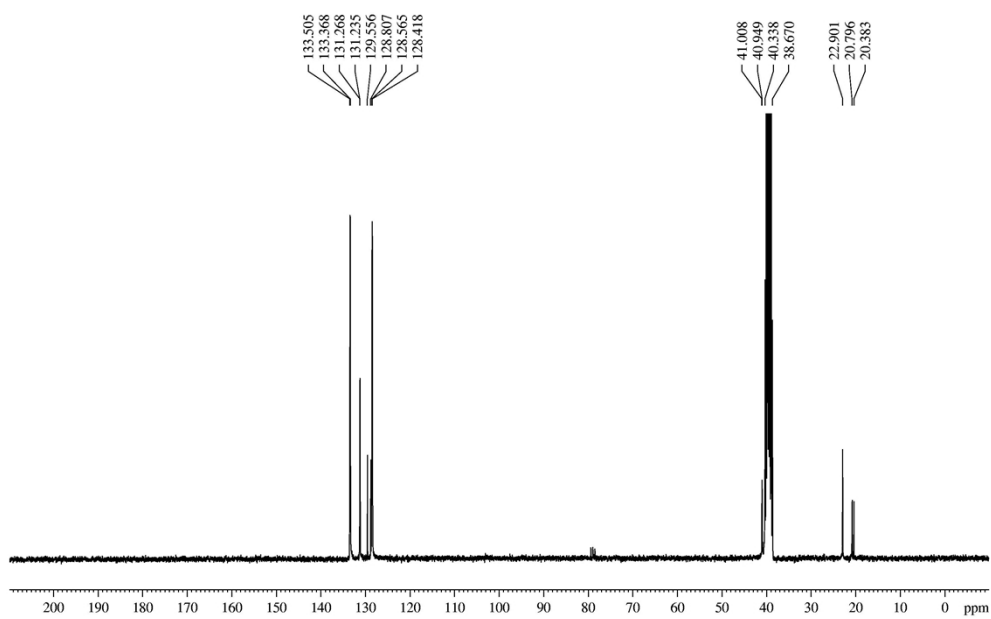

**Fig. S10.**  $^{13}\text{C}\{^1\text{H}\}$  NMR Spectra of complex **1**

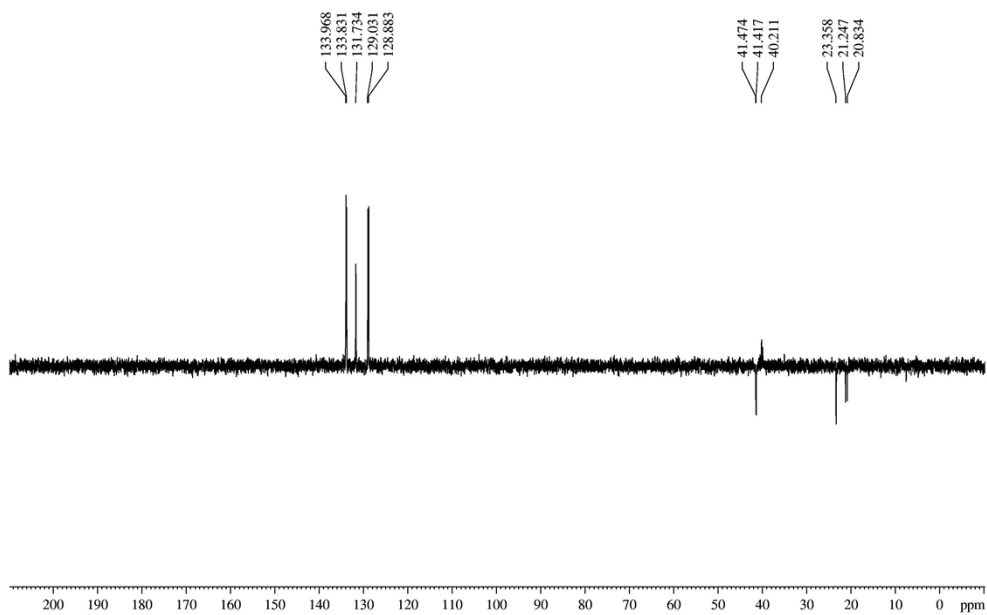

**Fig. S11.** DEPT-135 NMR Spectra of complex **1**

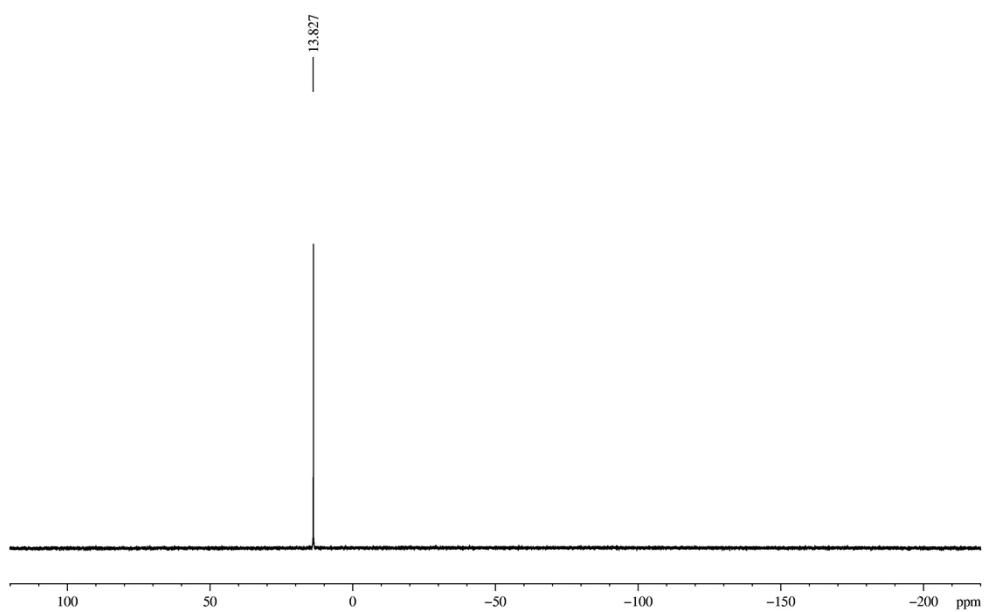

**Fig. S12.**  $^{31}\text{P}\{^1\text{H}\}$  NMR Spectra of complex **1**

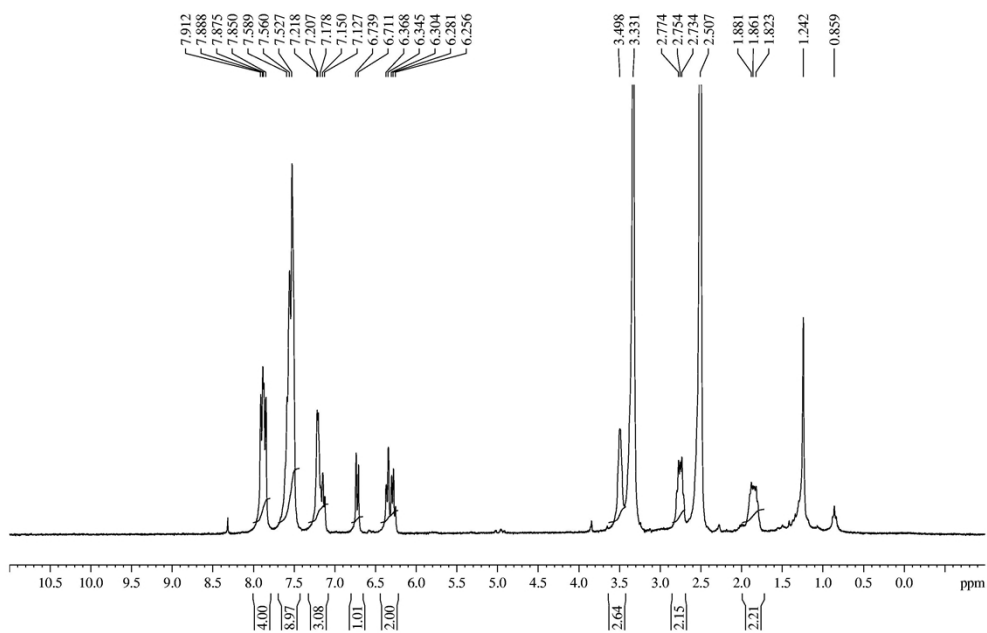

Fig. S13.  $^1\text{H}$  NMR Spectra of complex 2

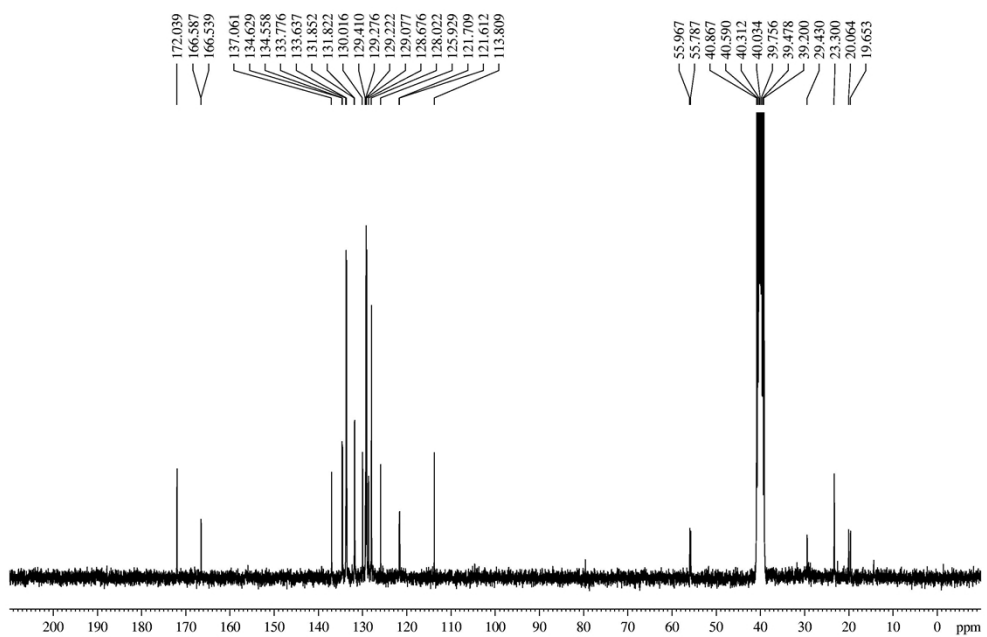

Fig. S14.  $^{13}\text{C}\{^1\text{H}\}$  NMR Spectra of complex 2

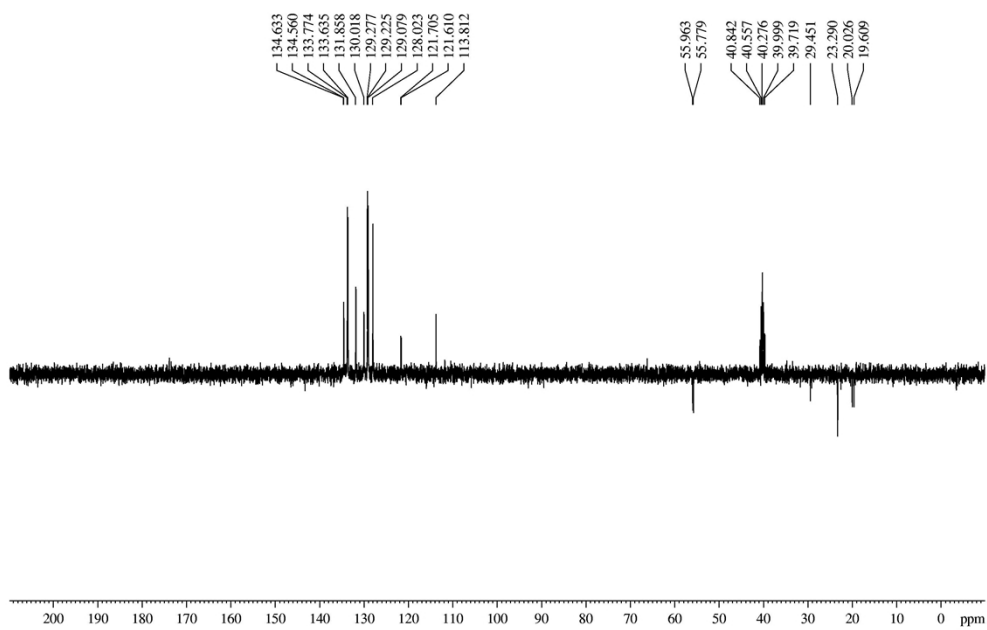

**Fig. S15.** DEPT-135 NMR Spectra of complex 2

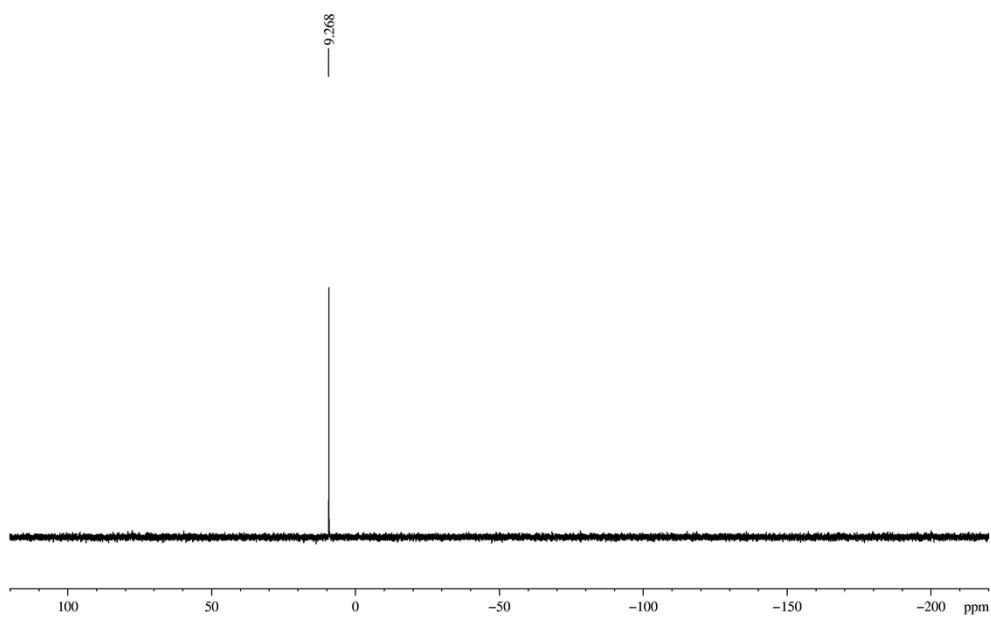

**Fig. S16.**  $^{31}\text{P}\{^1\text{H}\}$  NMR Spectra of complex 2

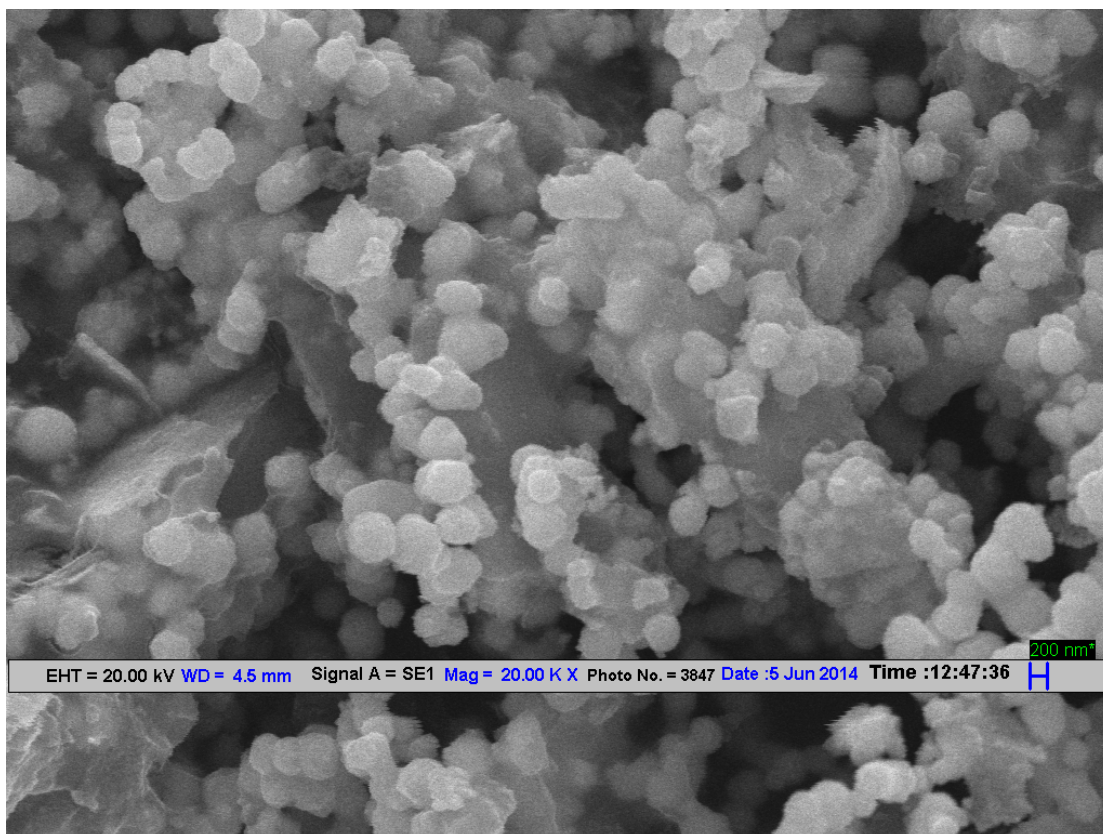

**Figure S17.** SEM image of  $\text{Pd}_7\text{P}_3$  NPs obtained from complex 1

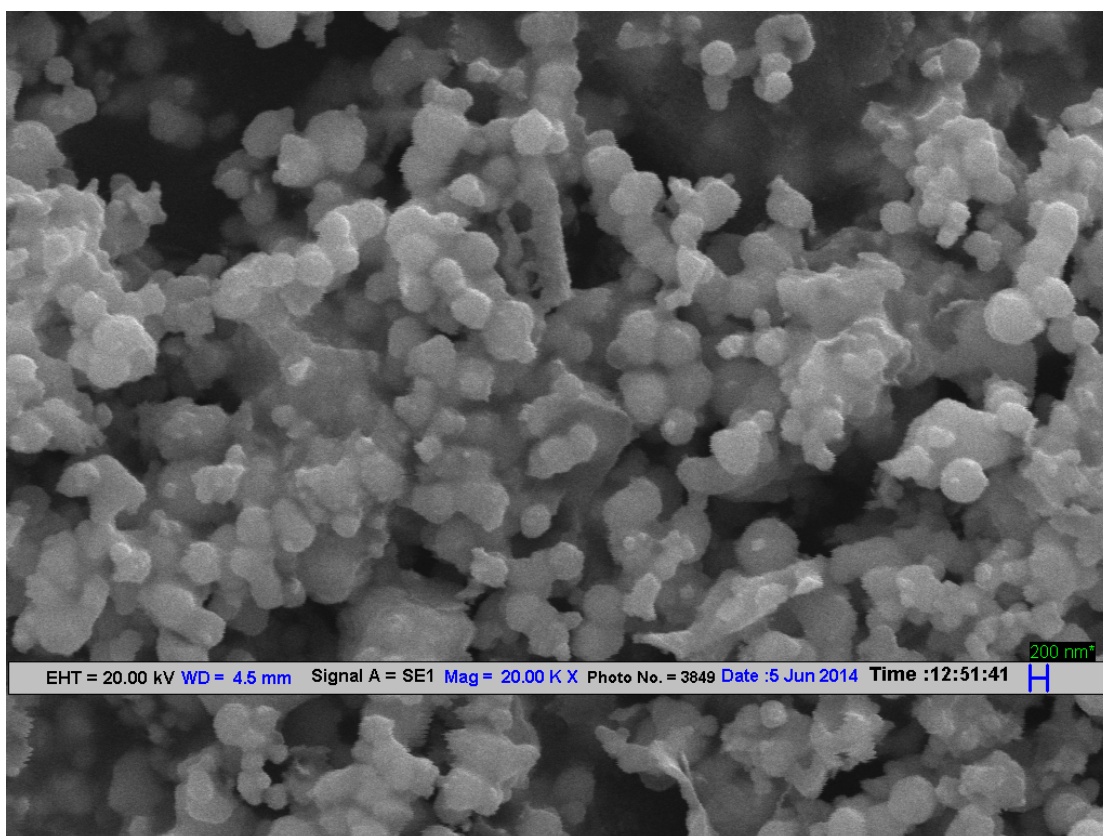

**Fig. S18.** SEM image of  $\text{Pd}_3\text{P}_{0.8}$  NPs obtained from complex 2

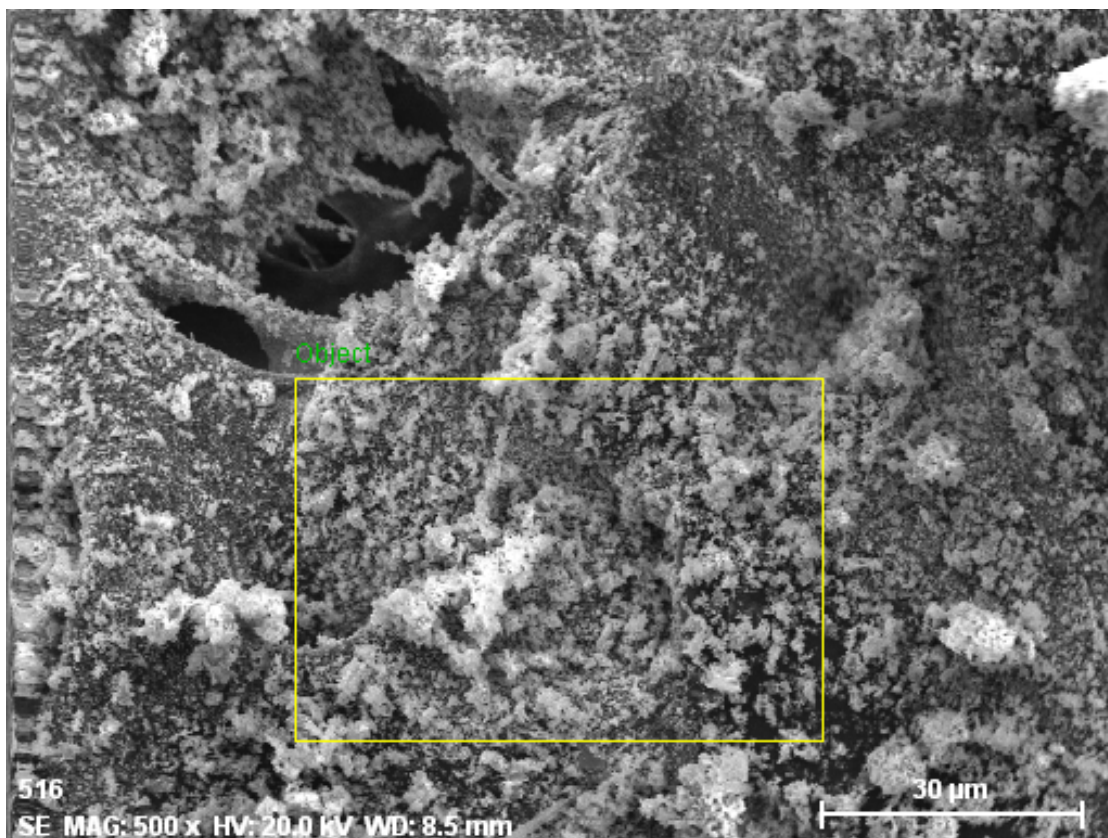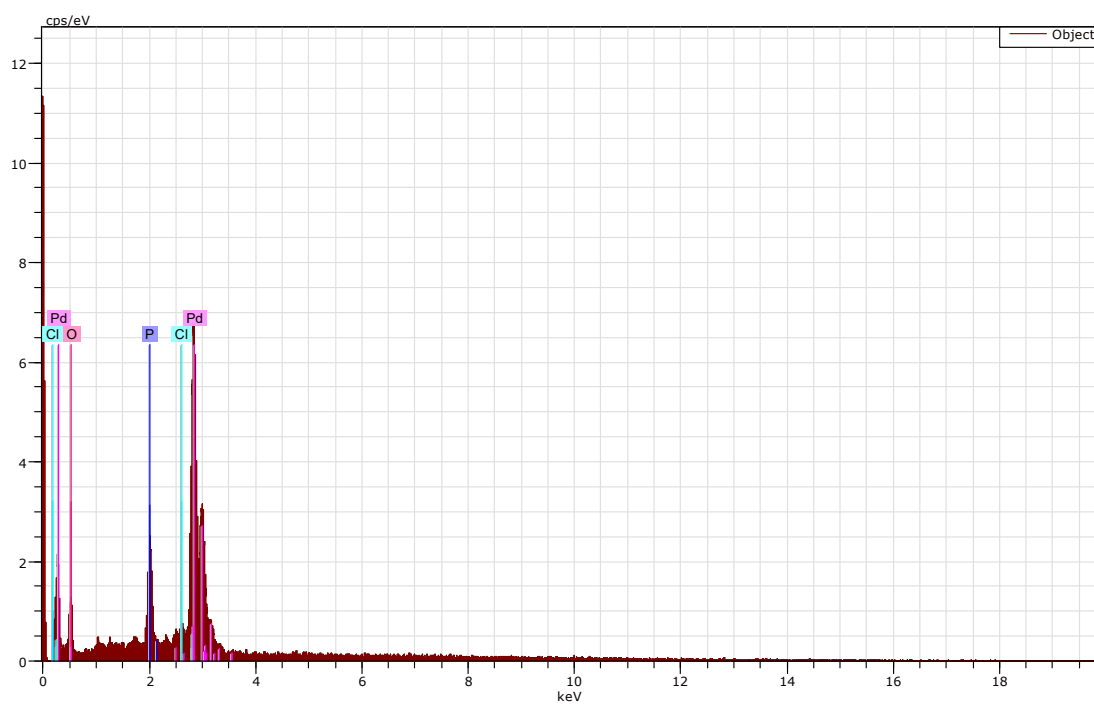

**Fig. S19.** SEM-EDX of  $\text{Pd}_7\text{P}_3$  NPs obtained from complex **1**



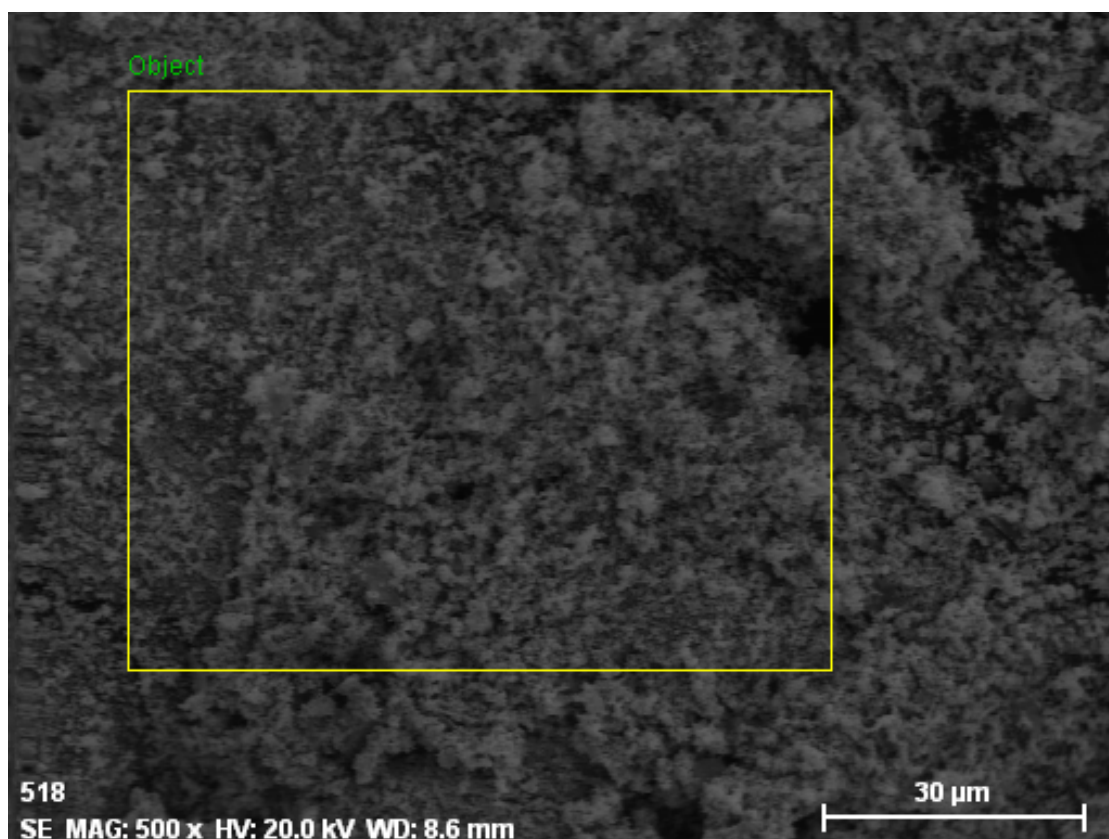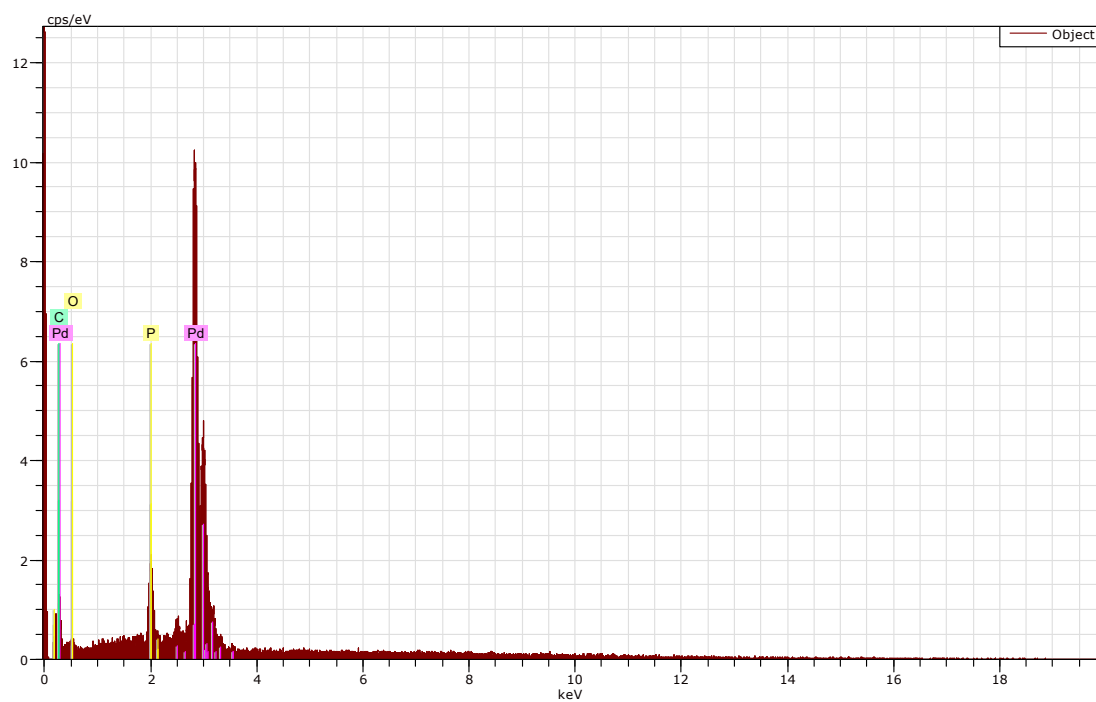

Fig. S20. SEM-EDX of  $\text{Pd}_3\text{P}_{0.8}$  NPs obtained from complex 2

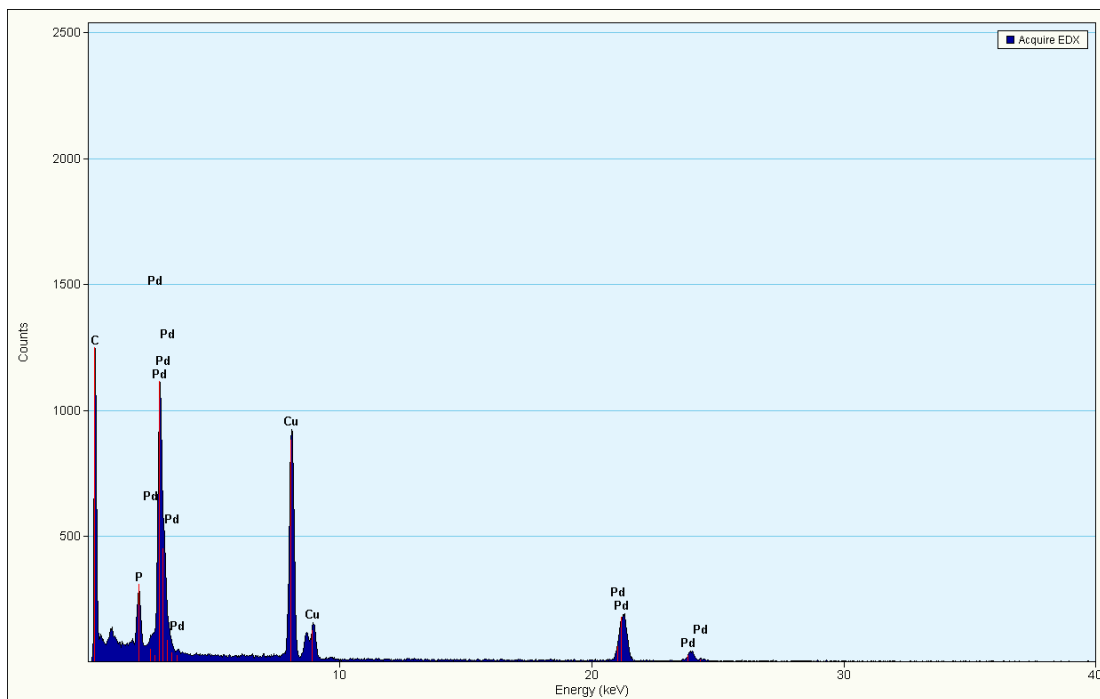

**Fig. S21.** TEM-EDX of Pd<sub>7</sub>P<sub>3</sub> NPs obtained from complex 1

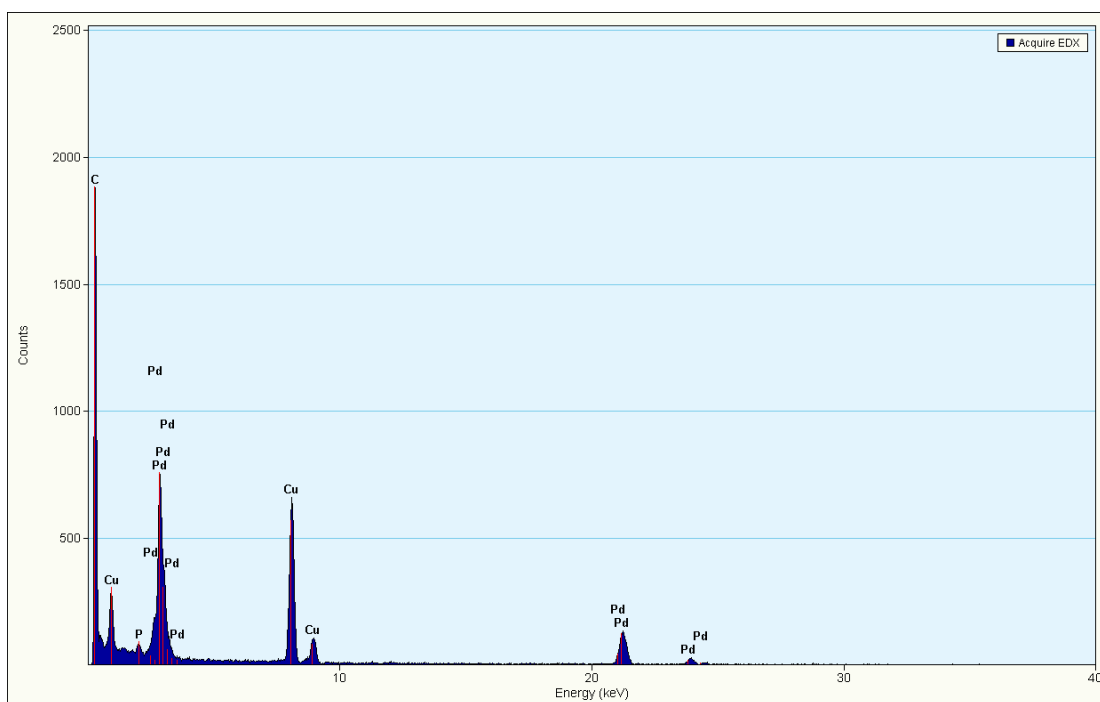

**Fig. S22.** TEM-EDX of Pd<sub>3</sub>P<sub>0.8</sub> NPs obtained from complex 2

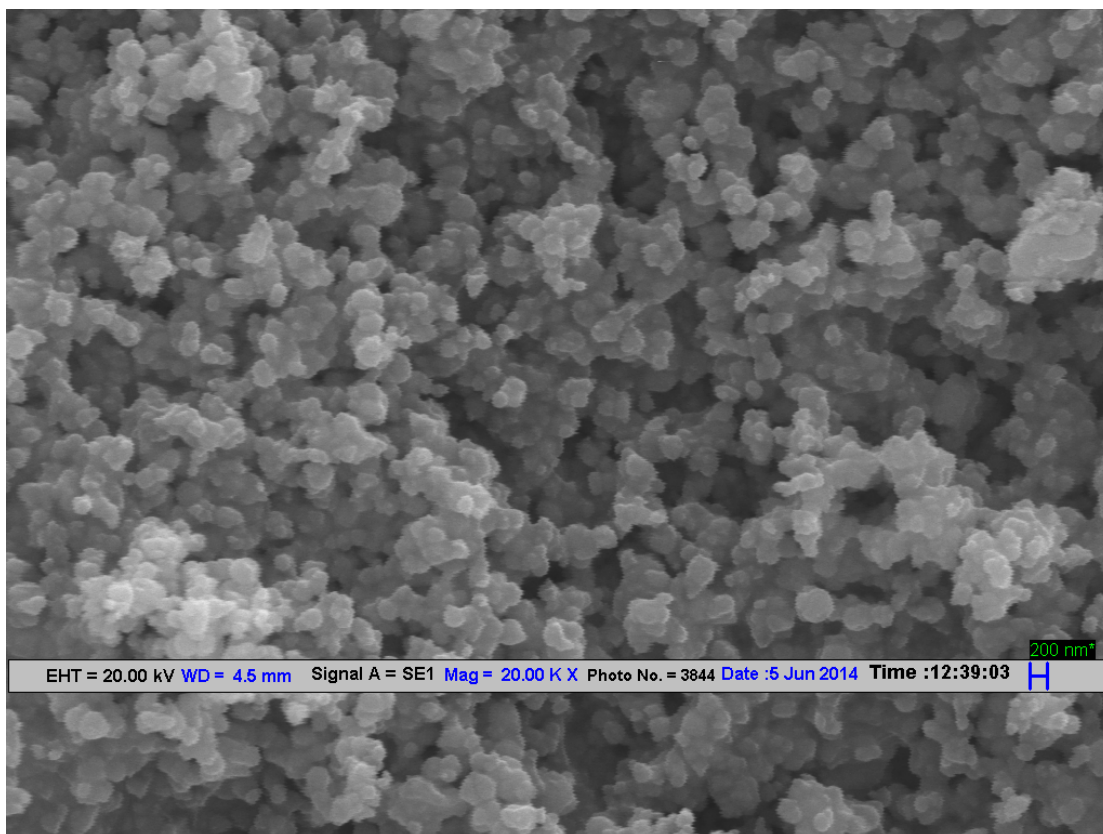

**Fig. S23.** SEM image of decomposition product of **1** obtained after Suzuki coupling reaction

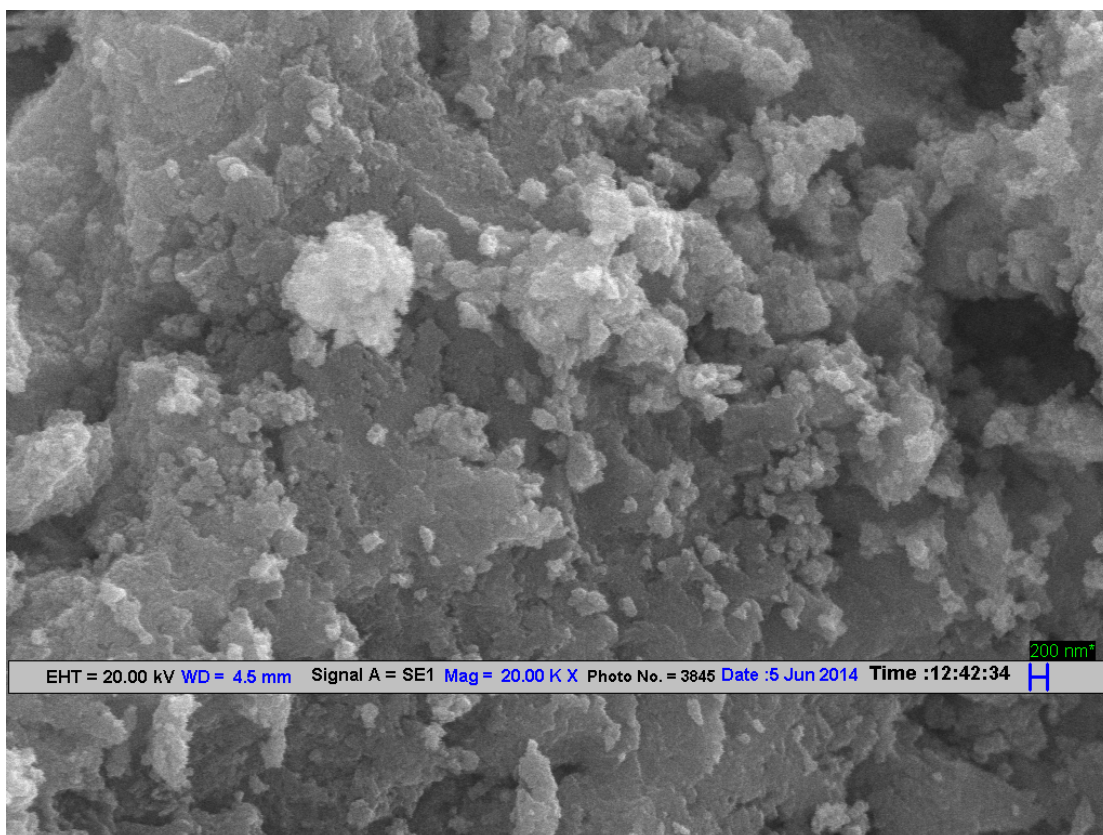

**Fig. S24.** SEM image of decomposition product of **2** obtained after Suzuki coupling reaction

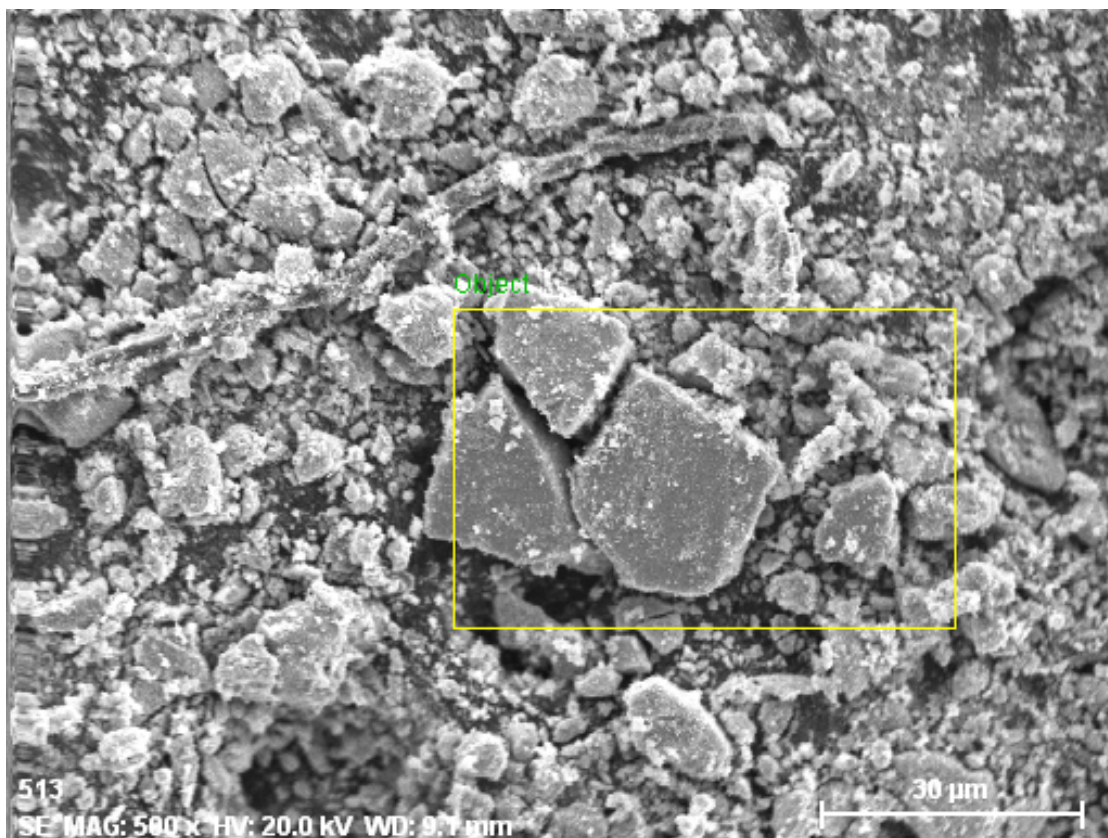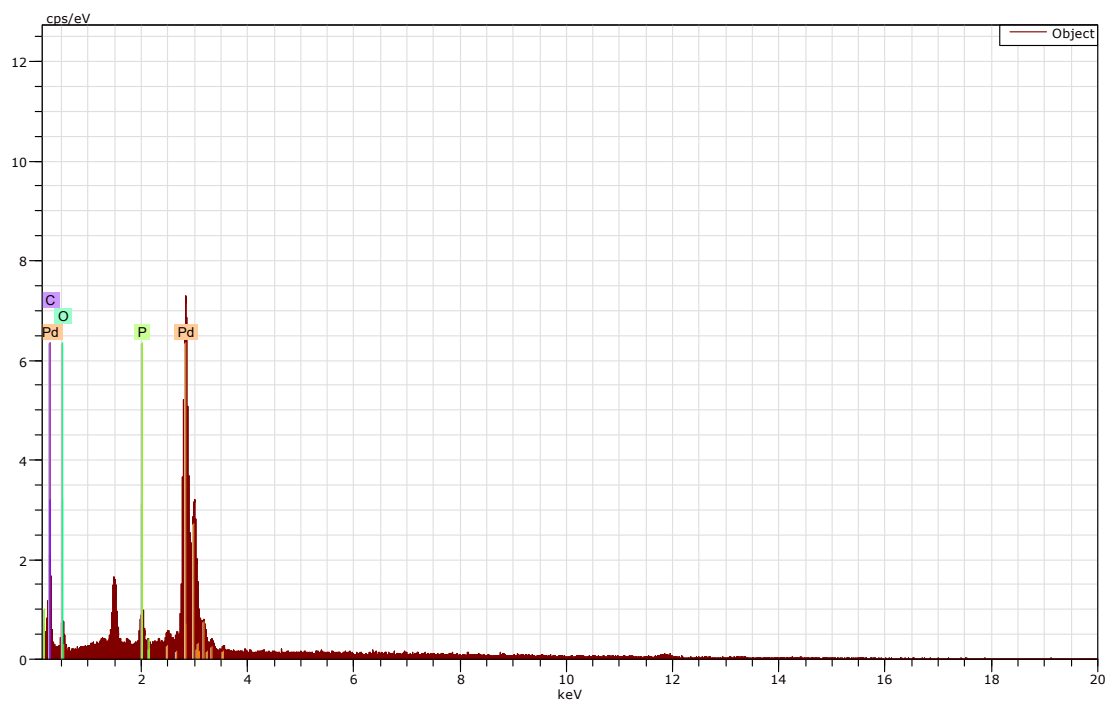

**Fig. S25.** SEM-EDX of decomposition product of **1** obtained after Suzuki coupling reaction

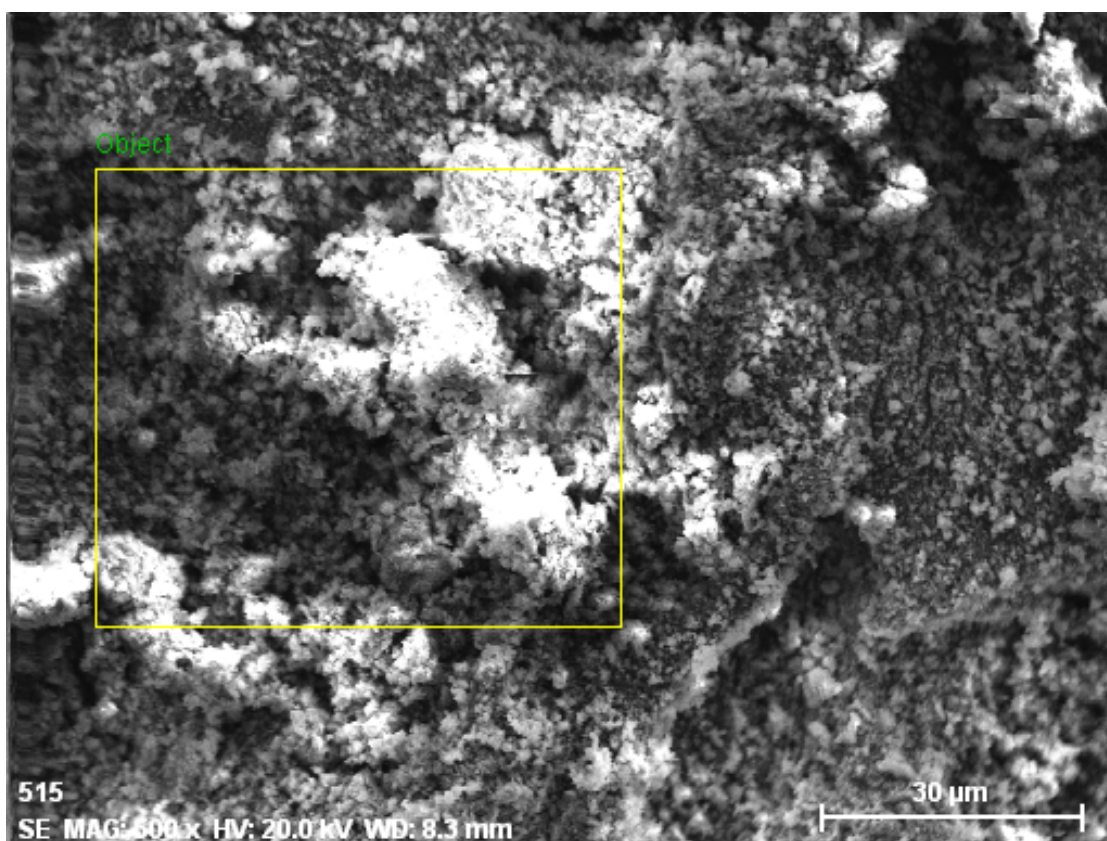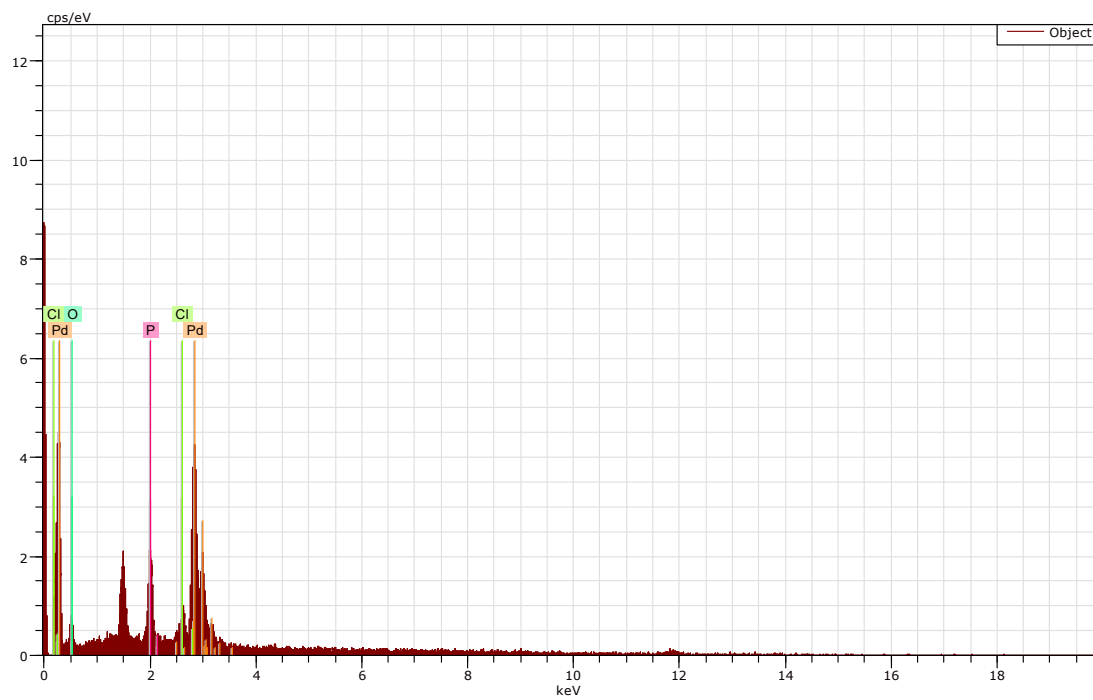

**Fig. S26.** SEM-EDX of decomposition product of **2** obtained after Suzuki coupling reaction

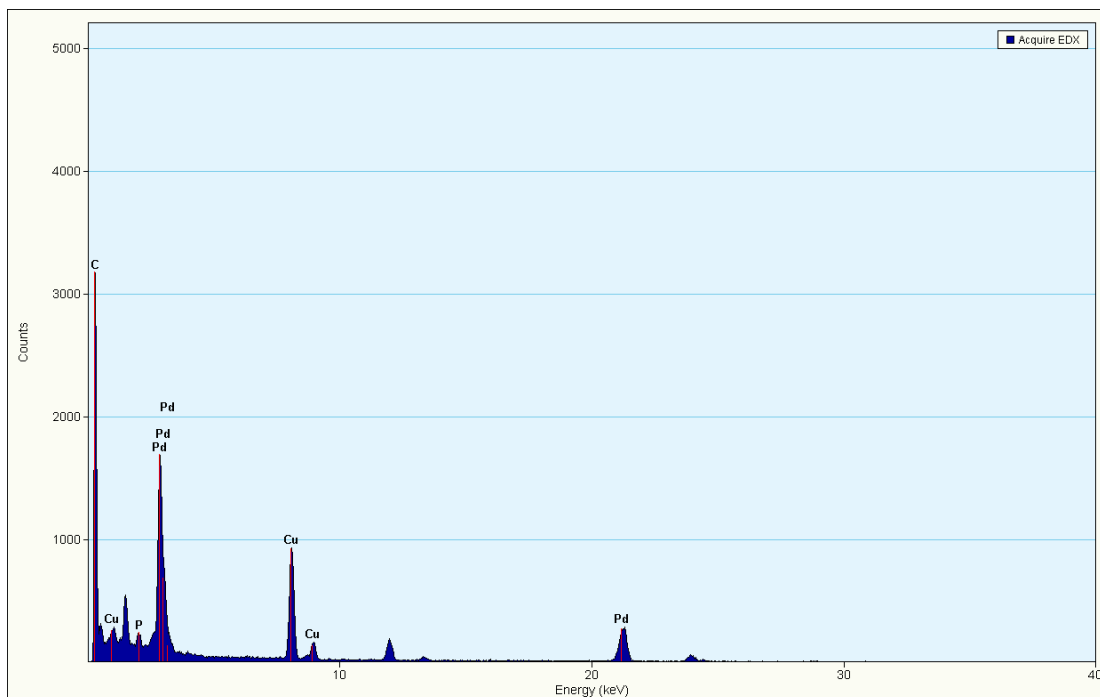

**Fig. S27.** TEM-EDX of decomposition product of **1** obtained after Suzuki coupling reaction

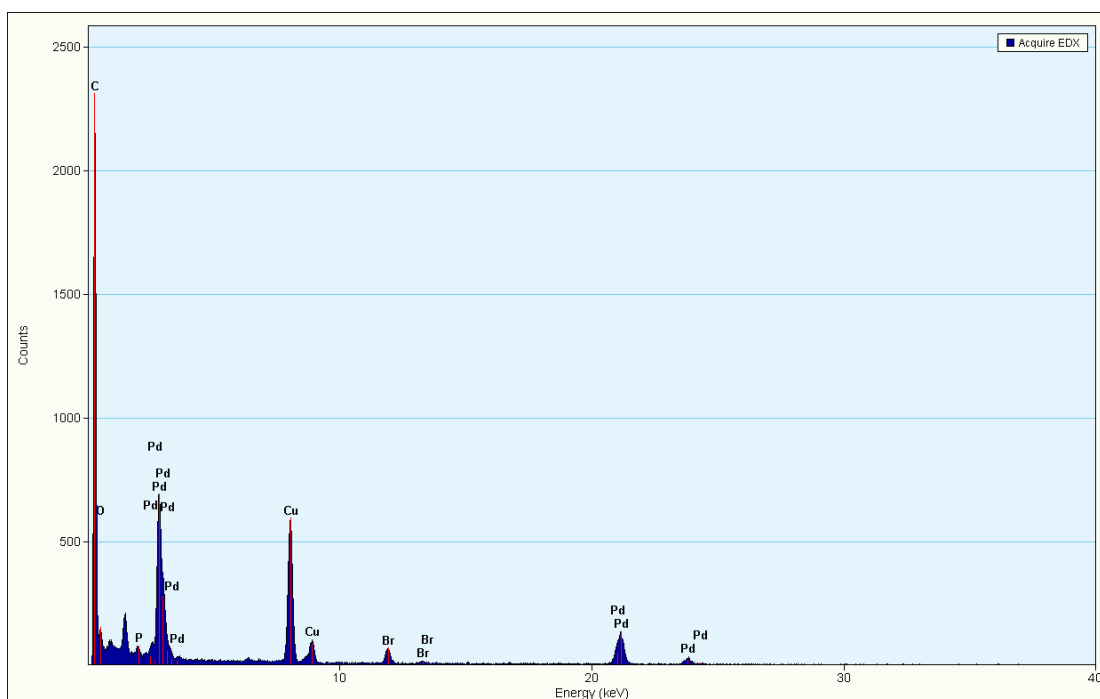

**Fig. S28.** TEM-EDX of decomposition product of **2** obtained after Suzuki coupling reaction
